# Supplementary material
Source: MDPI journal article supplement (https://www.mdpi.com/2071-1050/13/8/4488)
Supplement: s1 [file s1 › sustainability-1130783-supplementary.pdf]

**Table S1.** Stressors and Indicators compiled from existing datasets and used to evaluate NRV status of KECs in the Dixie and Fishlake National Forests. Data types can be considered stressors, indicators, or both. Our assessments integrate several indicators from these existing datasets to estimate ecological integrity of riparian and groundwater-dependent ecosystems.

| Stressor/Indicator Data                                                                | Source(s)                                                                                  |
|----------------------------------------------------------------------------------------|--------------------------------------------------------------------------------------------|
| Total length of stream segments with year-round surface flows                          | National Hydrography Dataset                                                               |
| Total length of stream segments with seasonal surface flows and accessible groundwater | National Hydrography Dataset                                                               |
| Number of springs per acre, as mapped in the Dixie National Forest geodatabase         | Dixie National Forest Geodatabase                                                          |
| Road miles per acre of geographic unit                                                 | US Forest Service Terrestrial Condition Assessment                                         |
| Percentage of roads that are unpaved and non-graveled                                  | US Forest Service Terrestrial Condition Assessment                                         |
| Recreation trail miles per acre                                                        | US Forest Service National Dataset                                                         |
| Road miles per 50-year floodplain acre                                                 | US Forest Service Terrestrial Condition Assessment, 50-year Floodplain Map                 |
| Trail miles per 50-year floodplain acre                                                | US Forest Service National Dataset, 50-year Floodplain Map                                 |
| Number of recreation sites per 50-year floodplain acre                                 | US Forest Service National Dataset, 50-year Floodplain Map                                 |
| Number of water diversion points per acre                                              | Utah Division of Water Rights Database<br>US Forest Service Water Rights and Uses Database |
| Number of diversion or retention dams per acre                                         | Utah Division of Water Rights Database<br>US Forest Service Water Rights and Uses Database |
| Percentage of the area overlapping range management units (grazing leases)             | US Forest Service National Dataset                                                         |
| Percentage of the area overlapping actively grazed range management units              | US Forest Service National Dataset                                                         |
| Percentage of the area with timber harvest                                             | US Forest Service National Dataset                                                         |
| Percentage of the area with timber harvest using clearcut methods                      | US Forest Service National Dataset                                                         |

|                                                                                                                                                                                            |                                                       |
|--------------------------------------------------------------------------------------------------------------------------------------------------------------------------------------------|-------------------------------------------------------|
| Percentage of the area burned by high severity wildfires between 1984 and 2014                                                                                                             | US Forest Service Terrestrial Condition Assessment    |
| Percent change in winter temperature                                                                                                                                                       | US Forest Service Terrestrial Condition Assessment    |
| Percent change in winter precipitation                                                                                                                                                     | US Forest Service Terrestrial Condition Assessment    |
| Percentage of 50-year floodplain with high or very high wildfire hazard potential                                                                                                          | US Forest Service Terrestrial Condition Assessment    |
| Percentage of 50-year floodplain experiencing moderate to high severity wildfire between 1984 and 2014                                                                                     | US Forest Service Terrestrial Condition Assessment    |
| Mean proportion of confiner encroachment occurring along stream reaches                                                                                                                    | Riparian Condition Assessment Toolbox                 |
| Mean proportion of upland vegetation encroachment occurring along stream reaches                                                                                                           | Riparian Condition Assessment Toolbox                 |
| Water Quantity Condition - Indicator of whether stream hydrographs have no or minor, moderate, or significant departure from natural conditions                                            | US Forest Service Watershed Condition Classification  |
| Riparian/Wetland Vegetation Condition - Indicator of whether native riparian and wetland vegetation is functioning properly, functional-at-risk, or impaired                               | US Forest Service Watershed Condition Classification  |
| Percentage of stream reaches where vegetation has converted from riparian to developed or agriculture cover                                                                                | Riparian Condition Assessment Toolbox                 |
| Average annual stream temperature                                                                                                                                                          | US Forest Service NorWeST Stream Temperature Database |
| Percentage of water bodies listed as impaired by the state                                                                                                                                 | US Forest Service Watershed Condition Classification  |
| Indicator water quality issues above natural or background levels                                                                                                                          | US Forest Service Watershed Condition Classification  |
| Indicator of cementation of streambed substrate                                                                                                                                            | US Forest Service Level II Riparian Surveys           |
| Percentage of water bodies listed as impaired by the state                                                                                                                                 | Utah Department of Environmental Quality              |
| Channel Shape and Function Attribute - Indicator describing whether width-to-depth ratios within a watershed are within the range of conditions expected in the absence of human influence | US Forest Service Watershed Condition Classification  |
| % of stream segment with no change from riparian vegetation                                                                                                                                | Riparian Condition Assessment Toolbox                 |

|                                                                                                                                           |                                             |
|-------------------------------------------------------------------------------------------------------------------------------------------|---------------------------------------------|
| % of confined segment with conversion of riparian vegetation and replacement by developed land                                            | Riparian Condition Assessment Toolbox       |
| % of confined segment with conversion of riparian vegetation and floodplain development                                                   | Riparian Condition Assessment Toolbox       |
| Average percentage of streambanks classified as stable                                                                                    | US Forest Service Level II Riparian Surveys |
| Mean proportion of conversion to invasive species occurring along stream reaches                                                          | Riparian Condition Assessment Toolbox       |
| Percentage of stream reaches classified as confined by the RCA procedure                                                                  | Riparian Condition Assessment Toolbox       |
| Percentage of stream reaches with successional status classified as in late succession or potential natural community                     | US Forest Service Level 2 Riparian Surveys  |
| Percentage of stream reaches with forage trend, based on condition and composition of vegetation, that was classified as stable or upward | US Forest Service Level 2 Riparian Surveys  |
| Percentage of sites determined to be in desired condition based on overall trend, seral status, stability rating, and ground cover        | US Forest Service Level 3 Riparian Surveys  |

---
